# Supplementary material
Source: ML conference proceedings conference paper supplement (https://openaccess.thecvf.com/content/WACV2025/html/Bhattacharyya_Information_Extraction_from_WACV_2025_paper.html)
Supplement: Supplementary file 1 [file Bhattacharyya_Information_Extraction_from_WACV_2025_supplemental.pdf]

# Supplementary Material

## 1. CORD dataset prompts

| Function   | Prompt Template                                                                                                                                                                                                                 |
|------------|---------------------------------------------------------------------------------------------------------------------------------------------------------------------------------------------------------------------------------|
| Role/Task  | Claude, you are a seasoned invoice annotator. Given a document, your task is to extract the following information in JSON format:                                                                                               |
| Format     | { "line_item":                                                                                                                                                                                                                  |
| Format     | [{ "discount_price": "",                                                                                                                                                                                                        |
| Format     | "identifier": "",                                                                                                                                                                                                               |
| Format     | "name": "",                                                                                                                                                                                                                     |
| Format     | "other": "", "quantity": "",                                                                                                                                                                                                    |
| Format     | "sub": [{"sub_name": "",                                                                                                                                                                                                        |
| Format     | "sub_price": "",                                                                                                                                                                                                                |
| Format     | "sub_quantity": ""}],                                                                                                                                                                                                           |
| Format     | "subtotal_price": "",                                                                                                                                                                                                           |
| Format     | "total_price": "", "unit_price": "" } ],                                                                                                                                                                                        |
| Format     | "subtotal": { "discount_price": "",                                                                                                                                                                                             |
| Format     | "other": [],                                                                                                                                                                                                                    |
| Format     | "service_price": "", "subtotal_price": [],                                                                                                                                                                                      |
| Format     | "tax_price": [] },                                                                                                                                                                                                              |
| Format     | "total": { "cash_price": [],                                                                                                                                                                                                    |
| Format     | "change_price": "",                                                                                                                                                                                                             |
| Format     | "credit_card_price": "",                                                                                                                                                                                                        |
| Format     | "emoney_price": "",                                                                                                                                                                                                             |
| Format     | "line_item_quantity_count": "",                                                                                                                                                                                                 |
| Format     | "line_item_type_count": "",                                                                                                                                                                                                     |
| Format     | "other": "",                                                                                                                                                                                                                    |
| Format     | "total_price": [] } }                                                                                                                                                                                                           |
| Rules      | Please be mindful of the following rules:                                                                                                                                                                                       |
| Rules      | -The extraction must respect the JSON schema.                                                                                                                                                                                   |
| Rules      | -Only extract entities specified in the schema. Do not skip any entity types.                                                                                                                                                   |
| Rules      | -The values must only include text found in the document.                                                                                                                                                                       |
| Rules      | -Use null or [] for missing entity types.                                                                                                                                                                                       |
| Rules      | -Do not indent the json you produce.                                                                                                                                                                                            |
| Rules      | -Examples of valid string value format: "\$ 1234.50", "John Do", null.                                                                                                                                                          |
| Rules      | -Examples of valid list value format: ["\$ 1234.50", "John Do"], [].                                                                                                                                                            |
| Rules      | -Report the entire text present for each field. For example, if the price mentioned is usd 123.50, mention usd 123.500 and not 123,500. If unit price mentioned is @12, mention @12 and not 12. Respect the format of the text. |
| Rules      | - For price, double check whether the number format uses comma (eg 124,000) or dot (eg 124.000).                                                                                                                                |
| Rules      | If 124.000 is mentioned, use that as price.                                                                                                                                                                                     |
| Rules      | - Place special attention on the newline character \n. Strings not separated by it are likely part of the same entity.                                                                                                          |
| Rules      | - Return the json, double check the json format, do not write anything extra                                                                                                                                                    |
| Rules      | Return output for this image                                                                                                                                                                                                    |
| image data | <i>image</i>                                                                                                                                                                                                                    |

Table 1. TAIL prompt for CORD

For TAIL labels, we modified the attributes keys to meaningful names for better zero-shot extraction ([1]). For example,

”menu” was changed to ”line.item”, ”nm” was changed to ”name”, and so on. The full prompt is given in Table 1:

## References

- [1] Vincent Perot, Kai Kang, Florian Luisier, Guolong Su, Xiaoyu Sun, Ramya Sree Boppana, Zilong Wang, Zifeng Wang, Jiaqi Mu, Hao Zhang, Chen-Yu Lee, and Nan Hua. Lmdx: Language model-based document information extraction and localization, 2024. 1
